# Supplementary material for: Molecular mechanism of Afadin substrate recruitment to the receptor phosphatase PTPRK via its pseudophosphatase domain
Source: eLife journal article supplement (doi:10.7554/elife.79855), 2022-10-20
Supplement: fig1-figsupp2-data2 [file Figure 5 - figure supplement 1 - source data 1.xlsx]

## Sheet: Sheet1
SAMPLE		pY1230 Afadin	Normalised to no protein		pY118 Paxillin	Normalised to no protein		pY228 p120cat	Normalised to no protein
15 min	No protein	2088.28	1		7915.73	1		6112.8	1
	PTPRK ICD	725.184	0.347264		7721.27	0.975433		6729.12	1.10082
	PTPRK ICD - DM	1904.22	0.911865		8204.88	1.03653		7758.41	1.26921
30 min	No protein	1824.4	1		8881.73	1		17519.7	1
	PTPRK ICD	1110.98	0.608959		7442.37	0.837941		10493	0.598928
	PTPRK ICD - DM	1846.74	1.01225		8859.15	0.997457		8878.12	0.506751
45 min	No protein	2023.76	1		11674.9	1		16488.3	1
	PTPRK ICD	741.669	0.366481		9450.2	0.809444		7199.99	0.436672
	PTPRK ICD - DM	2429.18	1.20033		11489.6	0.984129		6871.82	0.416769
60 min	No protein	2698.95	1		11274.8	1		16947.4	1
	PTPRK ICD	1411.35	0.522924		10662.4	0.945687		7767.7	0.458342
	PTPRK ICD - DM	1933.64	0.716441		9627.22	0.85387		7161.46	0.42257
90 min	No protein	2654.42	1		4337.37	1		16848.4	1
	PTPRK ICD	975.619	0.367545		6854.9	1.58043		5690.05	0.337721
	PTPRK ICD - DM	2525.54	0.951447		5814.66	1.3406		4847.75	0.287728
