# Supplementary material for: Molecular mechanism of Afadin substrate recruitment to the receptor phosphatase PTPRK via its pseudophosphatase domain
Source: eLife journal article supplement (doi:10.7554/elife.79855), 2022-10-20
Supplement: fig3-data2 [file elife-79855-fig3-data2-v2.zip]

## Acquisition Information

| # | Image ID   | Acquire Time         | Channels | Resolution | Intensities | Quality | Analysis | Image Name | Comment |
|---|------------|----------------------|----------|------------|-------------|---------|----------|------------|---------|
| 1 | 0004597_02 | 19-Aug-2022 17:20:45 | 700 800  | 169um      | Auto Auto   | high    | Manual   | 0004597_02 |         |

## Image Display Values

| Channel | Color                       | Minimum | Maximum | K |
|---------|-----------------------------|---------|---------|---|
| 700     | Gray Scale (Black on White) | 3.89    | 38.9    | 0 |

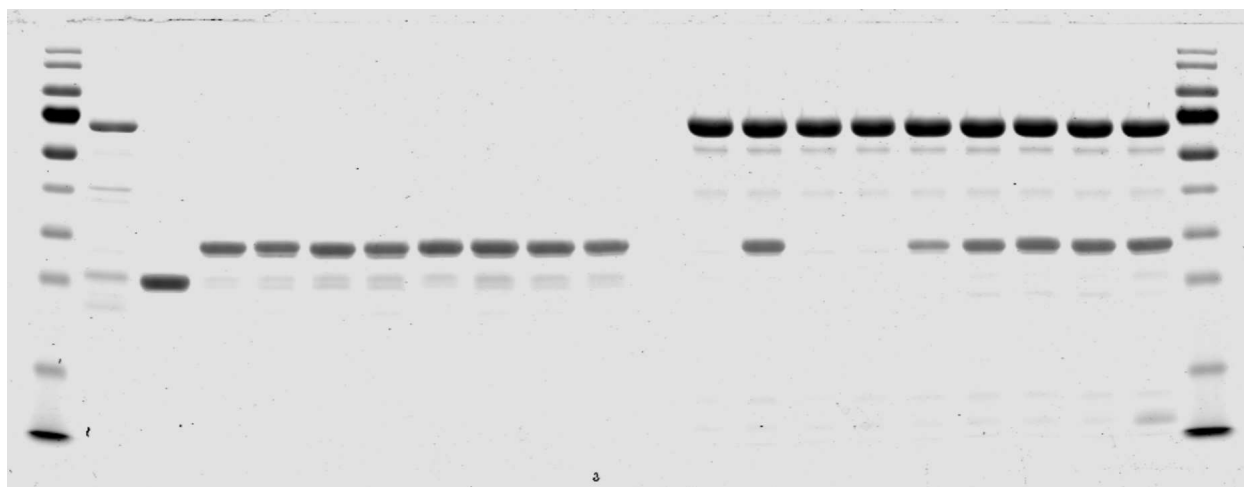

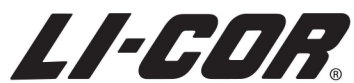

Image ID: 0004597\_02  
Acquire Time: 19-Aug-2022 17:20:45

Page 2

Acquisition Information (continued)

| # Image Modifications |                                         |
|-----------------------|-----------------------------------------|
| 1                     | Flip Top to Bottom Image ID: 0004597_01 |
