# Supplementary material for: Molecular mechanism of Afadin substrate recruitment to the receptor phosphatase PTPRK via its pseudophosphatase domain
Source: eLife journal article supplement (doi:10.7554/elife.79855), 2022-10-20
Supplement: fig4-data4 [file Afadin CC-PTPRK-mutant pulldown 3.pdf › Figure 4 – source data 4/Original files/Afadin CC-PTPRK-mutant pulldown 3.pdf]

## Acquisition Information

| # | Image ID   | Acquire Time         | Channels | Resolution | Intensities | Quality | Analysis | Image Name | Comment |
|---|------------|----------------------|----------|------------|-------------|---------|----------|------------|---------|
| 1 | 0004599_06 | 22-Aug-2022 09:51:08 | 700 800  | 169um      | Auto Auto   | high    | Manual   | 0004599_06 |         |

## Image Display Values

| Channel | Color                       | Minimum | Maximum | K |
|---------|-----------------------------|---------|---------|---|
| 700     | Gray Scale (Black on White) | 2.95    | 58.0    | 0 |

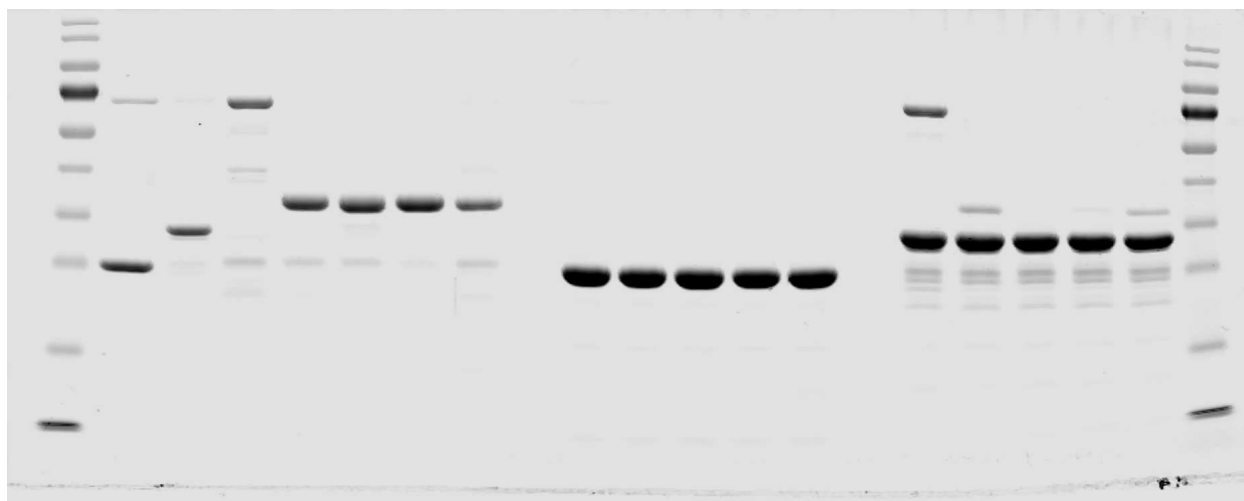

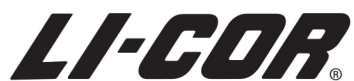

Image ID: 0004599\_06  
Acquire Time: 22-Aug-2022 09:51:08

Page 2

Acquisition Information (continued)

| # Image Modifications |                                                                                                           |
|-----------------------|-----------------------------------------------------------------------------------------------------------|
| 1                     | Flip Top to Bottom Image ID: 0004599_01; Noise Removal Image ID: 0004599_02; Sharpen Image ID: 0004599_04 |
