# Supplementary material for: Molecular mechanism of Afadin substrate recruitment to the receptor phosphatase PTPRK via its pseudophosphatase domain
Source: eLife. 2022 Oct 20;11:e79855. doi: 10.7554/eLife.79855 (PMC9640194; doi:10.7554/eLife.79855)
Supplement: Figure 1—figure supplement 2—source data 4. [file elife-79855-fig1-figsupp2-data4.xlsx]

## Sheet: Sheet1
SAMPLE		pY1230 Afadin	Normalised to no protein		pY118 Paxillin	Normalised to no protein		pY228 p120cat	Normalised to no protein
15 min	No protein	4104.59	1		9491.94	1		6969.02	1
	PTPRK D1	4873.2	1.18726		10304.3	1.08558		5628.25	0.807609
	PTPRK ICD	2458.47	0.598956		13440.7	1.41601		6417.61	0.920876
	PTPRK ICD-CSCS	3858.25	0.939984		15900.7	1.67517		6637.02	0.952361
30 min	No protein	3386.32	1		13726.6	1		6325.68	1
	PTPRK D1	3502.49	1.03431		11081.4	0.807289		3463.47	0.547525
	PTPRK ICD	1916.17	0.565858		10888.8	0.793263		4893.54	0.773599
	PTPRK ICD-CSCS	3164.2	0.934406		10074.4	0.733929		8578.09	1.35607
45 min	No protein	2897.95	1		10154.4	1		10070.3	1
	PTPRK D1	2580.88	0.890588		9622.34	0.947606		4351.25	0.432088
	PTPRK ICD	1485.88	0.512735		10907	1.07412		5899.07	0.585791
	PTPRK ICD-CSCS	2639.95	0.910972		11083.3	1.09148		10805.6	1.07302
60 min	No protein	3660.2	1		10524	1		11201.8	1
	PTPRK D1	2598.18	0.709846		9501.87	0.902879		3550	0.316915
	PTPRK ICD	1524.28	0.416447		11123.5	1.05697		5217.2	0.465748
	PTPRK ICD-CSCS	2222.71	0.607266		10679.9	1.01481		11256.8	1.00491
90 min	No protein	3700.15	1		12273.4	1		12414.2	1
	PTPRK D1	2293.57	0.619859		9367.68	0.763251		2326.86	0.187435
	PTPRK ICD	1312.45	0.354701		9819.39	0.800055		3669.05	0.295552
	PTPRK ICD-CSCS	2983.25	0.806251		10564.3	0.860752		10362.5	0.834728
