# Supplementary material for: Molecular mechanism of Afadin substrate recruitment to the receptor phosphatase PTPRK via its pseudophosphatase domain
Source: eLife. 2022 Oct 20;11:e79855. doi: 10.7554/eLife.79855 (PMC9640194; doi:10.7554/eLife.79855)
Supplement: Figure 1—figure supplement 2—source data 6. [file elife-79855-fig1-figsupp2-data6.xlsx]

## Sheet: Top graph
	Dox (ng/ml)	pY1230 Afadin	Total Afadin	Normalised
WT	0	4009.17	5684.37	0.705297
	50	2327.76	5296.12	0.439522
	250	3106.54	4643.42	0.66902
	500	2475.44	5741.25	0.431168
PTPRK KO	0	10076.9	8307.29	1.21302
	50	6840.23	4541.49	1.50616
	250	7444.23	5892.73	1.26329
	500	9723.21	8002.66	1.215
PTPRK KO+PTPRK-WT	0	6597.6	3296.05	2.00167
	50	8931.26	4250.42	2.10127
	250	8864.79	9699.65	0.913929
	500	4134.41	6247.02	0.661821
PTPRK KO+PTPRK-C1089S	0	5703.6	6910.15	0.825395
	50	7859.55	8860.46	0.887037
	250	5665.7	5357.42	1.05754
	500	10976.7	8180.39	1.34184
Data plotted for graph

## Sheet: Bottom graph
	Dox (ng/ml)	pY1230 Afadin	Total Afadin	Normalised
WT	0	10531.7	2873.56	0.272849
	50	10708.3	3342.29	0.312121
	250	10866.4	3389.52	0.311927
	500	13321.5	3793.47	0.284763
PTPRK KO	0	16039.7	10170.3	0.634069
	50	11102.1	8158.33	0.734846
	250	12308	8214.19	0.667385
	500	12744.2	7384.02	0.5794
PTPRK KO+PTPRK-WT	0	13228.3	6008.44	0.454212
	50	9903.31	3140.52	0.317118
	250	13795.3	3603.66	0.261223
	500	10437.1	2984.88	0.285987
PTPRK KO+PTPRK-C1089S	0	11983.1	5110.07	0.426441
	50	10683.3	3706.76	0.346967
	250	8118.14	3726.4	0.459021
	500	7610.24	4006.42	0.526451
Data plotted for graph
